# Supplementary material
Source: publisher figshare collection journal article supplement (https://gsajournals.figshare.com/ndownloader/files/24398993)
Supplement: Supplementary file 1 [file 24398993]

## Sheet: DMR
Table S2: Differentially methylated region (DMR) called by the metilene software. SGCE/PEG10 DMR is highlighted.
chr	start	stop	q-value	mean difference: mean g1 (CN) - mean g2 (PA)	#CpGs	p (MWU)	p (2D KS)	mean g1 (CN)	mean g2 (PA)
chr9	70355708	70356378	0.72244	-0.2139	10	0.00012107	0.0036521	0.68713	0.90103
chr9	70638206	70638302	1	0.221667	10	0.0049689	0.05362	0.90937	0.6877
chr9	70909278	70909808	1	-0.2071	10	0.0035851	0.025296	0.58633	0.79343
chr9	70960979	70961058	0.53275	-0.244205	13	0.0038148	0.0015572	0.70941	0.95362
chr9	71152322	71152726	0.42099	-0.204	10	0.00019479	0.00093095	0.5809	0.7849
chr9	71189892	71190386	1	-0.214111	12	0.019152	0.032939	0.61164	0.82575
chr9	71192586	71193504	1	-0.228333	10	0.0012685	0.018567	0.58983	0.81817
chr9	71958419	71958856	1	-0.212633	10	0.020278	0.052373	0.73783	0.95047
chr9	72223546	72223719	0.26822	-0.3039	10	0.0049689	0.00034459	0.61497	0.91887
chr9	72660479	72661051	0.72244	-0.255567	10	0.00020653	0.0037334	0.61293	0.8685
chr9	72677919	72678105	1	-0.205367	10	0.0018115	0.012811	0.31117	0.51653
chr9	72906524	72907228	0.59149	-0.2235	10	7.4254e-05	0.0023986	0.64507	0.86857
chr9	73451924	73451986	1	-0.207333	10	0.0088747	0.053652	0.72603	0.93337
chr9	73723779	73724134	1	-0.205733	10	0.0039395	0.027083	0.57863	0.78437
chr9	74472468	74472812	5.9433e-05	-0.386139	12	1.033e-11	3.053e-09	0.31417	0.70031
chr9	74473138	74473529	4.4763e-05	-0.310586	37	5.3846e-14	2.0531e-09	0.48397	0.79456
chr9	74473529	74475712	3.499e-137	-0.493481	192	4.1855e-14	6.4192e-143	0.46291	0.9564
chr9	74475748	74476324	8.5906e-12	-0.403615	26	4.4409e-14	9.4562e-17	0.54664	0.95026
chr9	75962152	75962630	1	-0.206067	10	0.00051211	0.027093	0.52183	0.7279
chr9	76967932	76968119	0.35541	-0.244833	10	5.7862e-05	0.00058646	0.47927	0.7241
chr9	76973553	76974234	0.7537	-0.224139	12	0.00021115	0.0040683	0.55169	0.77583
chr9	77208319	77208512	0.011812	-0.34107	19	7.1359e-10	2.1671e-06	0.34542	0.68649
chr9	78468611	78468899	0.66324	-0.262286	14	1.5536e-05	0.0028947	0.34112	0.6034
chr9	78750125	78750504	0.066455	-0.265733	10	4.6192e-07	2.2571e-05	0.40877	0.6745
chr9	80274841	80275594	0.82838	-0.230533	10	0.0016378	0.0056731	0.61133	0.84187
chr9	80889822	80890325	1	-0.210633	10	0.002439	0.025828	0.4578	0.66843
chr9	83309355	83309666	0.99184	0.223533	10	0.00041013	0.0077246	0.747	0.52347
chr9	84081035	84081105	1	-0.225467	10	0.00087945	0.012821	0.62863	0.8541
chr9	84400898	84401461	1	-0.243367	10	0.0018115	0.052443	0.61797	0.86133
chr9	84661315	84661837	0.26822	-0.202889	12	1.1216e-05	0.00032231	0.67153	0.87442
